# Supplementary material for: Genome-wide RNAi analysis reveals that simultaneous inhibition of specific mevalonate pathway genes potentiates tumor cell death
Source: PubMed Central journal article supplement (PMC4694962; doi:10.18632/oncotarget.4817), 2015-08-22
Supplement: oncotarget-06-26909-s001.pdf [file oncotarget-06-26909-s001.pdf]

**SUPPLEMENTARY TABLE**

**Supplementary Table S1: A complete list of all the under-represented shRNAs in the fluvastatin-treated A549 cells compared to ethanol control-treated cells.**
